# Supplementary material for: Chiral lanthanide hexaazamacrocycles for circularly polarized luminescence, high relaxivity and magnetic resonance imaging
Source: Royal Society of Chemistry journal article supplement (doi:10.1039/d4qi00275j), 2024-01-01
Supplement: d4qi00275j1.pdf [file d4qi00275j1.pdf]

## Electronic Supplementary Information (ESI)

### Chiral lanthanide hexaazamacrocycles for circularly polarized luminescence, high relaxivity and magnetic resonance imaging

Yuxin Tang,<sup>a</sup> Minghong Jian,<sup>c</sup> Baobing Tang,<sup>b</sup> Zhenhua Zhu,<sup>d</sup> Zhenxin Wang,<sup>c</sup> and Yunling Liu<sup>\*b</sup>

**Abstract:** Multifunctional lanthanide complexes have been extensively studied in recent years owing to their widespread applications in physics, chemistry and biology, including quantum information processing, molecular spintronics and theranostics. The multifunctionality includes chirality, luminescence, magnetism, ferroelectricity and fluorescence/magnetic resonance imaging etc. Although various of N- and O-donor ligands have shown the ability to synthesize these complexes, Schiff bases are still the mostly widely used in constructing the air stable species. Herein, we report the facile gram-level synthesis of three pairs of lanthanide macrocycle enantiomers via an in situ [2+2] imine condensation with trivalent lanthanide ion as template. Eu(III)-based compounds, **R/S-Eu** and **R/S-Eu-Ph<sub>3</sub>PO**, both shown efficient circularly polarized luminescence (CPL) with maximum dissymmetry factors ( $g_{lum}$ ) of 0.098 and 0.110, respectively. The latter exhibited stronger emission intensity and longer luminescence lifetime than the former due to the lower vibrational coordination structures around Eu(III) ion. Gd(III)-based species, **R/S-Gd**, possess a relatively high relaxivity up to 35.04 and 34.09 mM<sup>-1</sup> S<sup>-1</sup> for R- and S-enantiomer, benefitting from the presence of one coordinated water molecule and abundant intermolecular H-bonds. In addition, the results of MTT assay and in vitro experiments demonstrated the low toxicity and efficient MRI of Gd(III)-chelates to A549 cells.

## Table of Contents

|                                                                                                                                                       |    |
|-------------------------------------------------------------------------------------------------------------------------------------------------------|----|
| Table S1. Crystal Data and Structure Refinement for R-Gd and S-Gd.....                                                                                | 4  |
| Table S2. Crystal Data and Structure Refinement for R-Eu and S-Eu.....                                                                                | 5  |
| Table S3. Crystal data and structure refinement for R-Eu-Ph <sub>3</sub> PO and S-Eu-Ph <sub>3</sub> PO.....                                          | 6  |
| Table S4. Crystal data and structure refinement for R-Y.....                                                                                          | 7  |
| Table S5. Selected bond distances (Å) for complexes R-Gd and S-Gd.....                                                                                | 8  |
| Table S6. Selected bond angles (°) for complexes R-Gd and S-Gd.....                                                                                   | 8  |
| Table S7. Selected bond distances (Å) for complexes R-Eu and S-Eu.....                                                                                | 9  |
| Table S8. Selected bond angles (°) for complexes R-Eu and S-Eu.....                                                                                   | 9  |
| Table S9. Selected bond distances (Å) for complexes R-Eu-Ph <sub>3</sub> PO and S-Eu-Ph <sub>3</sub> PO.....                                          | 10 |
| Table S10. Selected bond angles (°) for complexes R-Eu-Ph <sub>3</sub> PO and S-Eu-Ph <sub>3</sub> PO.....                                            | 10 |
| Table S11. The CShM values calculated by SHAPE 2.1 for R-Gd and S-Gd.....                                                                             | 11 |
| Table S12. The CShM values calculated by SHAPE 2.1 for R-Eu and S-Eu.....                                                                             | 12 |
| Table S13. The CShM values calculated by SHAPE 2.1 for R/S-Eu-Ph <sub>3</sub> PO.....                                                                 | 12 |
| Table S14. The CShM values calculated by SHAPE 2.1 for R-Y.....                                                                                       | 13 |
| Table S15. CPL brightness for R/S-Eu and R/S-Eu-Ph <sub>3</sub> PO.....                                                                               | 13 |
| Fig. S1 The intermolecular H-bonds in S-Gd.....                                                                                                       | 14 |
| Fig. S2 The variable-temperature magnetic susceptibilities of S-Gd.....                                                                               | 14 |
| Fig. S3 The variable-temperature magnetic susceptibilities of R-Gd.....                                                                               | 14 |
| Fig. S4 CD spectra of R/S-Eu in CH <sub>3</sub> OH (c = 1 × 10 <sup>-5</sup> mol L <sup>-1</sup> ).....                                               | 15 |
| Fig. S5 CD spectra of R/S-Eu-Ph <sub>3</sub> PO in CH <sub>3</sub> OH (c = 1 × 10 <sup>-5</sup> mol L <sup>-1</sup> ).....                            | 15 |
| Fig. S6 Thermogravimetric analysis of S-Eu.....                                                                                                       | 16 |
| Fig. S7 Thermogravimetric analysis of S-Gd.....                                                                                                       | 16 |
| Fig. S8 Phosphorescence spectrum of S-Gd.....                                                                                                         | 17 |
| Fig. S9 Quantum yield of S-Eu in CH <sub>3</sub> OH at room temperature.....                                                                          | 18 |
| Fig. S10 Quantum yield of S-Eu in H <sub>2</sub> O at room temperature.....                                                                           | 18 |
| Fig. S11 Quantum yield of S-Eu-Ph <sub>3</sub> PO in CH <sub>3</sub> OH at room temperature.....                                                      | 19 |
| Fig. S12 Quantum yield of S-Eu-Ph <sub>3</sub> PO in H <sub>2</sub> O at room temperature.....                                                        | 19 |
| Fig. S13 Circularly polarized luminescence ( <i>g</i> <sub>lum</sub> ) spectra of R/S-Eu.....                                                         | 20 |
| Fig. S14 Circularly polarized luminescence ( <i>g</i> <sub>lum</sub> ) spectra of R/S-Eu-Ph <sub>3</sub> PO.....                                      | 20 |
| Fig. S15 Decay curve of S-Eu in D <sub>2</sub> O at room temperature.....                                                                             | 21 |
| Fig. S16 HR-MALDI-TOF spectrum of S-Gd in CH <sub>3</sub> OH at room temperature.....                                                                 | 21 |
| Fig. S17 HR-ESI-MS & simulated spectra of S-Eu-Ph <sub>3</sub> PO and <sup>1</sup> H spectrum of isostructural Y(III) compound.....                   | 22 |
| Fig. S18 Relaxivity determined from concentration-dependent <i>T</i> <sub>1</sub> -weighted MR measurements at 1.2 T of R-Gd at room temperature..... | 22 |
| Fig. S19 Cell viabilities of A549 cells after incubated with various concentrations of Gd(III)-based compounds for 24 h.....                          | 23 |
| References.....                                                                                                                                       | 23 |

**Table S1. Crystal Data and Structure Refinement for R-Gd and S-Gd.**

| <b>Compound reference</b>                 | <b>R-Gd</b>                                                                                      | <b>S-Gd</b>                                                                                      |
|-------------------------------------------|--------------------------------------------------------------------------------------------------|--------------------------------------------------------------------------------------------------|
| Chemical formula                          | C <sub>92</sub> H <sub>104</sub> O <sub>10</sub> N <sub>12</sub> Cl <sub>6</sub> Gd <sub>2</sub> | C <sub>92</sub> H <sub>104</sub> O <sub>10</sub> N <sub>12</sub> Cl <sub>6</sub> Gd <sub>2</sub> |
| Formula Mass                              | 2065.07                                                                                          | 2065.07                                                                                          |
| Temperature (K)                           | 180.0                                                                                            | 180.0                                                                                            |
| Crystal system                            | monoclinic                                                                                       | monoclinic                                                                                       |
| Space group                               | <i>P</i> 2 <sub>1</sub>                                                                          | <i>P</i> 2 <sub>1</sub>                                                                          |
| <i>a</i> (Å)                              | 18.1664(4)                                                                                       | 18.1673(4)                                                                                       |
| <i>b</i> (Å)                              | 10.6762(2)                                                                                       | 10.6796(2)                                                                                       |
| <i>c</i> (Å)                              | 25.5474(6)                                                                                       | 25.5480(5)                                                                                       |
| $\alpha$ (°)                              | 90                                                                                               | 90                                                                                               |
| $\beta$ (°)                               | 101.5720(10)                                                                                     | 101.6180(10)                                                                                     |
| $\gamma$ (°)                              | 90                                                                                               | 90                                                                                               |
| Unit cell volume (Å <sup>3</sup> )        | 4854.15(18)                                                                                      | 4855.25(17)                                                                                      |
| <i>Z</i>                                  | 2                                                                                                | 2                                                                                                |
| $\rho_{\text{calc}}$ (g/cm <sup>3</sup> ) | 1.413                                                                                            | 1.413                                                                                            |
| $\mu$ / mm <sup>-1</sup>                  | 1.580                                                                                            | 1.580                                                                                            |
| <i>F</i> (000)                            | 2100.0                                                                                           | 2100.0                                                                                           |
| Radiation                                 | MoK $\alpha$ ( $\lambda$ = 0.71073)                                                              | MoK $\alpha$ ( $\lambda$ = 0.71073)                                                              |
| Reflections collected                     | 58921                                                                                            | 47035                                                                                            |
| Independent reflections                   | 16980                                                                                            | 16953                                                                                            |
| $R_{\text{int}}$                          | 0.0411                                                                                           | 0.0319                                                                                           |
| GOF on <i>F</i> <sup>2</sup>              | 1.059                                                                                            | 1.052                                                                                            |
| $R_1$ ( $I \geq 2\sigma(I)$ )             | 0.0350                                                                                           | 0.0340                                                                                           |
| $wR_2$ (all data)                         | 0.0950                                                                                           | 0.0934                                                                                           |
| Flack parameter                           | 0.000(4)                                                                                         | 0.002(4)                                                                                         |
| CCDC number                               | 2313860                                                                                          | 2313872                                                                                          |

**Table S2. Crystal Data and Structure Refinement for R-Eu and S-Eu.**

| <b>Compound reference</b>                 | <b>R-Eu</b>                                                                                      | <b>S-Eu</b>                                                                                      |
|-------------------------------------------|--------------------------------------------------------------------------------------------------|--------------------------------------------------------------------------------------------------|
| Chemical formula                          | C <sub>93</sub> H <sub>106</sub> O <sub>10</sub> N <sub>12</sub> Cl <sub>6</sub> Eu <sub>2</sub> | C <sub>93</sub> H <sub>108</sub> O <sub>11</sub> N <sub>12</sub> Cl <sub>6</sub> Eu <sub>2</sub> |
| Formula Mass                              | 2068.51                                                                                          | 2086.53                                                                                          |
| Temperature (K)                           | 180.0                                                                                            | 180.0                                                                                            |
| Crystal system                            | monoclinic                                                                                       | monoclinic                                                                                       |
| Space group                               | <i>P</i> 2 <sub>1</sub>                                                                          | <i>P</i> 2 <sub>1</sub>                                                                          |
| <i>a</i> (Å)                              | 18.1911(5)                                                                                       | 18.1836(4)                                                                                       |
| <i>b</i> (Å)                              | 10.6843(2)                                                                                       | 10.6889(3)                                                                                       |
| <i>c</i> (Å)                              | 25.5720(7)                                                                                       | 25.5445(7)                                                                                       |
| $\alpha$ (°)                              | 90                                                                                               | 90                                                                                               |
| $\beta$ (°)                               | 101.6420(10)                                                                                     | 101.5940(10)                                                                                     |
| $\gamma$ (°)                              | 90                                                                                               | 90                                                                                               |
| Unit cell volume (Å <sup>3</sup> )        | 4867.9(2)                                                                                        | 4863(6)                                                                                          |
| <i>Z</i>                                  | 2                                                                                                | 2                                                                                                |
| $\rho_{\text{calc}}$ (g/cm <sup>3</sup> ) | 1.411                                                                                            | 1.425                                                                                            |
| $\mu$ / mm <sup>-1</sup>                  | 1.502                                                                                            | 1.505                                                                                            |
| <i>F</i> (000)                            | 2112.0                                                                                           | 2132.0                                                                                           |
| Radiation                                 | MoK $\alpha$ ( $\lambda$ = 0.71073)                                                              | MoK $\alpha$ ( $\lambda$ = 0.71073)                                                              |
| Reflections collected                     | 54896                                                                                            | 48433                                                                                            |
| Independent reflections                   | 17147                                                                                            | 17076                                                                                            |
| $R_{\text{int}}$                          | 0.0464                                                                                           | 0.0593                                                                                           |
| GOF on $F^2$                              | 1.049                                                                                            | 1.059                                                                                            |
| $R_1$ ( $I \geq 2\sigma(I)$ )             | 0.0388                                                                                           | 0.0432                                                                                           |
| $wR_2$ (all data)                         | 0.1065                                                                                           | 0.1072                                                                                           |
| Flack parameter                           | 0.005(5)                                                                                         | 0.001(6)                                                                                         |
| CCDC number                               | 2313859                                                                                          | 2313857                                                                                          |

**Table S3. Crystal data and structure refinement for R-Eu-Ph<sub>3</sub>PO and S-Eu-Ph<sub>3</sub>PO.**

| <b>Compound reference</b>                                        | <b>R-Eu-Ph<sub>3</sub>PO</b>                                                                    | <b>S-Eu-Ph<sub>3</sub>PO</b>                                                                    |
|------------------------------------------------------------------|-------------------------------------------------------------------------------------------------|-------------------------------------------------------------------------------------------------|
| Chemical formula                                                 | C <sub>82</sub> H <sub>80</sub> Cl <sub>3</sub> EuN <sub>6</sub> O <sub>18</sub> P <sub>2</sub> | C <sub>82</sub> H <sub>80</sub> Cl <sub>3</sub> EuN <sub>6</sub> O <sub>18</sub> P <sub>2</sub> |
| Formula Mass                                                     | 1757.77                                                                                         | 1757.77                                                                                         |
| Temperature (K)                                                  | 180.0                                                                                           | 180.0                                                                                           |
| Crystal system                                                   | orthorhombic                                                                                    | orthorhombic                                                                                    |
| Space group                                                      | <i>P</i> 2 <sub>1</sub> 2 <sub>1</sub> 2 <sub>1</sub>                                           | <i>P</i> 2 <sub>1</sub> 2 <sub>1</sub> 2 <sub>1</sub>                                           |
| <i>a</i> (Å)                                                     | 13.3179(4)                                                                                      | 13.3140(3)                                                                                      |
| <i>b</i> (Å)                                                     | 21.3425(6)                                                                                      | 21.3334(6)                                                                                      |
| <i>c</i> (Å)                                                     | 27.7275(8)                                                                                      | 27.7364(7)                                                                                      |
| $\alpha$ (°)                                                     | 90                                                                                              | 90                                                                                              |
| $\beta$ (°)                                                      | 90                                                                                              | 90                                                                                              |
| $\gamma$ (°)                                                     | 90                                                                                              | 90                                                                                              |
| Unit cell volume (Å <sup>3</sup> )                               | 7881.2(4)                                                                                       | 7878.1(3)                                                                                       |
| <i>Z</i>                                                         | 4                                                                                               | 4                                                                                               |
| $\rho_{\text{calc}}$ (g/cm <sup>3</sup> )                        | 1.481                                                                                           | 1.482                                                                                           |
| $\mu$ / mm <sup>-1</sup>                                         | 1.013                                                                                           | 1.013                                                                                           |
| <i>F</i> (000)                                                   | 3608.0                                                                                          | 3608.0                                                                                          |
| Radiation                                                        | MoK $\alpha$ ( $\lambda$ = 0.71073)                                                             | MoK $\alpha$ ( $\lambda$ = 0.71073)                                                             |
| Reflections collected                                            | 57344                                                                                           | 54203                                                                                           |
| Independent reflections                                          | 13906                                                                                           | 13912                                                                                           |
| <i>R</i> <sub>int</sub>                                          | 0.0637                                                                                          | 0.0828                                                                                          |
| GOF on <i>F</i> <sup>2</sup>                                     | 1.061                                                                                           | 1.068                                                                                           |
| <i>R</i> <sub>1</sub> ( <i>I</i> $\geq$ 2 $\sigma$ ( <i>I</i> )) | 0.0362                                                                                          | 0.0434                                                                                          |
| <i>wR</i> <sub>2</sub> (all data)                                | 0.0870                                                                                          | 0.0935                                                                                          |
| Flack parameter                                                  | -0.006(5)                                                                                       | -0.011(6)                                                                                       |
| CCDC number                                                      | 2326932                                                                                         | 2326934                                                                                         |

**Table S4. Crystal data and structure refinement for R-Y.**

| <b>Compound reference</b>                                        | <b>R-Y</b>                                                                                      |
|------------------------------------------------------------------|-------------------------------------------------------------------------------------------------|
| Chemical formula                                                 | C <sub>94</sub> C <sub>16</sub> H <sub>112</sub> N <sub>12</sub> O <sub>12</sub> Y <sub>2</sub> |
| Formula Mass                                                     | 1992.47                                                                                         |
| Temperature (K)                                                  | 180.0                                                                                           |
| Crystal system                                                   | monoclinic                                                                                      |
| Space group                                                      | <i>P</i> 2 <sub>1</sub>                                                                         |
| <i>a</i> (Å)                                                     | 18.1007(6)                                                                                      |
| <i>b</i> (Å)                                                     | 10.6935(4)                                                                                      |
| <i>c</i> (Å)                                                     | 25.4908(9)                                                                                      |
| $\alpha$ (°)                                                     | 90                                                                                              |
| $\beta$ (°)                                                      | 101.5390(10)                                                                                    |
| $\gamma$ (°)                                                     | 90                                                                                              |
| Unit cell volume (Å <sup>3</sup> )                               | 4834.3(3)                                                                                       |
| <i>Z</i>                                                         | 2                                                                                               |
| $\rho_{\text{calc}}$ (g/cm <sup>3</sup> )                        | 1.369                                                                                           |
| $\mu$ / mm <sup>-1</sup>                                         | 1.425                                                                                           |
| <i>F</i> (000)                                                   | 2072.0                                                                                          |
| Radiation                                                        | MoK $\alpha$ ( $\lambda$ = 0.71073)                                                             |
| Reflections collected                                            | 64570                                                                                           |
| Independent reflections                                          | 16956                                                                                           |
| <i>R</i> <sub>int</sub>                                          | 0.0761                                                                                          |
| GOF on <i>F</i> <sup>2</sup>                                     | 1.036                                                                                           |
| <i>R</i> <sub>1</sub> ( <i>I</i> $\geq$ 2 $\sigma$ ( <i>I</i> )) | 0.0496                                                                                          |
| w <i>R</i> <sub>2</sub> (all data)                               | 0.1361                                                                                          |
| Flack parameter                                                  | 0.012(3)                                                                                        |
| <i>CCDC number</i>                                               | 2328816                                                                                         |

**Table S5. Selected bond distances (Å) for complexes R-Gd and S-Gd.**

| R-Gd    |          | S-Gd    |            |
|---------|----------|---------|------------|
| Gd1-Cl3 | 2.715(2) | Gd1-Cl3 | 2.7179(19) |
| Gd1-Cl4 | 2.662(2) | Gd1-Cl4 | 2.663(2)   |
| Gd1-O2  | 2.424(5) | Gd1-O2  | 2.416(5)   |
| Gd2-Cl1 | 2.671(2) | Gd2-Cl1 | 2.676(2)   |
| Gd2-Cl2 | 2.705(2) | Gd2-Cl2 | 2.705(2)   |
| Gd2-O1  | 2.503(6) | Gd2-O1  | 2.501(6)   |
| Gd1-N7  | 2.608(6) | Gd1-N7  | 2.604(6)   |
| Gd1-N8  | 2.571(6) | Gd1-N8  | 2.578(6)   |
| Gd1-N9  | 2.678(6) | Gd1-N9  | 2.667(6)   |
| Gd1-N10 | 2.641(6) | Gd1-N10 | 2.637(6)   |
| Gd1-N11 | 2.582(6) | Gd1-N11 | 2.595(6)   |
| Gd1-N12 | 2.681(6) | Gd1-N12 | 2.679(6)   |
| Gd2-N1  | 2.602(6) | Gd2-N1  | 2.596(6)   |
| Gd2-N2  | 2.568(7) | Gd2-N2  | 2.571(7)   |
| Gd2-N3  | 2.650(7) | Gd2-N3  | 2.652(6)   |
| Gd2-N4  | 2.593(7) | Gd2-N4  | 2.597(6)   |
| Gd2-N5  | 2.590(6) | Gd2-N5  | 2.590(6)   |
| Gd2-N6  | 2.675(6) | Gd2-N6  | 2.688(6)   |

**Table S6. Selected bond angles (°) for complexes R-Gd and S-Gd.**

| R-Gd        |            | S-Gd        |            |
|-------------|------------|-------------|------------|
| Cl3-Gd1-Cl4 | 148.43(7)  | Cl3-Gd1-Cl4 | 148.44(6)  |
| O2-Gd1-Cl3  | 71.84(15)  | O2-Gd1-Cl3  | 71.72(14)  |
| O2-Gd1-Cl4  | 139.53(15) | O2-Gd1-Cl4  | 139.63(14) |
| Cl1-Gd2-Cl2 | 146.18(7)  | Cl1-Gd2-Cl2 | 146.12(6)  |
| O1-Gd2-Cl1  | 75.22(14)  | O1-Gd2-Cl1  | 75.24(13)  |
| O1-Gd2-Cl2  | 138.58(14) | O1-Gd2-Cl2  | 138.62(14) |
| N1-Gd2-N2   | 61.6(2)    | N1-Gd2-N2   | 61.3(2)    |
| N2-Gd2-N3   | 61.0(2)    | N2-Gd2-N3   | 60.7(2)    |
| N3-Gd2-N4   | 61.0(2)    | N3-Gd2-N4   | 61.3(2)    |
| N4-Gd2-N5   | 62.1(2)    | N4-Gd2-N5   | 62.1(2)    |
| N5-Gd2-N6   | 59.74(19)  | N5-Gd2-N6   | 59.61(18)  |
| N6-Gd2-N1   | 60.66(19)  | N6-Gd2-N1   | 61.01(18)  |
| N7-Gd1-N8   | 62.32(19)  | N7-Gd1-N8   | 62.2(2)    |
| N8-Gd1-N9   | 60.55(18)  | N8-Gd1-N9   | 60.65(18)  |
| N9-Gd1-N10  | 60.14(18)  | N9-Gd1-N10  | 60.41(18)  |
| N10-Gd1-N11 | 61.2(2)    | N10-Gd1-N11 | 60.94(19)  |
| N11-Gd1-N12 | 60.27(19)  | N11-Gd1-N12 | 60.12(19)  |
| N12-Gd1-N7  | 60.73(19)  | N12-Gd1-N7  | 60.80(19)  |

**Table S7. Selected bond distances (Å) for complexes R-Eu and S-Eu.**

| R-Eu    |          | S-Eu    |          |
|---------|----------|---------|----------|
| Eu1-Cl3 | 2.726(2) | Eu1-Cl3 | 2.725(3) |
| Eu1-Cl4 | 2.673(2) | Eu1-Cl4 | 2.678(3) |
| Eu1-O2  | 2.429(6) | Eu1-O2  | 2.434(6) |
| Eu2-Cl1 | 2.684(2) | Eu2-Cl1 | 2.686(3) |
| Eu2-Cl2 | 2.718(2) | Eu2-Cl2 | 2.716(3) |
| Eu2-O1  | 2.522(6) | Eu2-O1  | 2.518(7) |
| Eu1-N7  | 2.612(7) | Eu1-N7  | 2.608(8) |
| Eu1-N8  | 2.573(7) | Eu1-N8  | 2.588(8) |
| Eu1-N9  | 2.668(7) | Eu1-N9  | 2.657(8) |
| Eu1-N10 | 2.641(6) | Eu1-N10 | 2.642(7) |
| Eu1-N11 | 2.592(7) | Eu1-N11 | 2.588(8) |
| Eu1-N12 | 2.685(7) | Eu1-N12 | 2.679(8) |
| Eu2-N1  | 2.603(6) | Eu2-N1  | 2.606(7) |
| Eu2-N2  | 2.569(8) | Eu2-N2  | 2.585(9) |
| Eu2-N3  | 2.660(7) | Eu2-N3  | 2.646(8) |
| Eu2-N4  | 2.609(7) | Eu2-N4  | 2.605(8) |
| Eu2-N5  | 2.595(7) | Eu2-N5  | 2.592(8) |
| Eu2-N6  | 2.671(7) | Eu2-N6  | 2.668(7) |

**Table S8. Selected bond angles (°) for complexes R-Eu and S-Eu.**

| R-Eu        |            | S-Eu        |            |
|-------------|------------|-------------|------------|
| Cl3-Eu1-Cl4 | 148.54(7)  | Cl3-Eu1-Cl4 | 148.63(8)  |
| O2-Eu1-Cl3  | 72.69(16)  | O2-Eu1-Cl3  | 70.45(18)  |
| O2-Eu1-Cl4  | 139.51(16) | O2-Eu1-Cl4  | 139.69(18) |
| Cl1-Eu2-Cl2 | 146.07(7)  | Cl1-Eu2-Cl2 | 146.19(18) |
| O1-Eu2-Cl1  | 75.41(15)  | O1-Eu2-Cl1  | 75.44(16)  |
| O1-Eu2-Cl2  | 138.50(15) | O1-Eu2-Cl2  | 138.36(18) |
| N1-Eu2-N2   | 61.3(2)    | N1-Eu2-N2   | 61.1(2)    |
| N2-Eu2-N3   | 60.8(2)    | N2-Eu2-N3   | 60.4(3)    |
| N3-Eu2-N4   | 61.4(2)    | N3-Eu2-N4   | 61.7(3)    |
| N4-Eu2-N5   | 61.8(2)    | N4-Eu2-N5   | 62.1(3)    |
| N5-Eu2-N6   | 59.9(2)    | N5-Eu2-N6   | 59.5(2)    |
| N6-Eu2-N1   | 60.7(2)    | N6-Eu2-N1   | 60.9(2)    |
| N7-Eu1-N8   | 61.9(2)    | N7-Eu1-N8   | 62.1(2)    |
| N8-Eu1-N9   | 60.7(2)    | N8-Eu1-N9   | 60.7(2)    |
| N9-Eu1-N10  | 60.4(2)    | N9-Eu1-N10  | 60.3(2)    |
| N10-Eu1-N11 | 61.2(2)    | N10-Eu1-N11 | 60.8(2)    |
| N11-Eu1-N12 | 60.1(2)    | N11-Eu1-N12 | 60.1(2)    |
| N12-Eu1-N7  | 60.7(2)    | N12-Eu1-N7  | 60.8(2)    |



**Table S9. Selected bond distances (Å) for complexes R-Eu-Ph<sub>3</sub>PO and S-Eu-Ph<sub>3</sub>PO.**

| <b>R-Eu-Ph<sub>3</sub>PO</b> |          | <b>S-Eu-Ph<sub>3</sub>PO</b> |          |
|------------------------------|----------|------------------------------|----------|
| Eu1-O1                       | 2.293(4) | Eu1 -O1                      | 2.292(4) |
| Eu1-O2                       | 2.325(4) | Eu1-O2                       | 2.325(5) |
| Eu1-O3                       | 2.467(4) | Eu1-O3                       | 2.468(5) |
| Eu1-N1                       | 2.629(5) | Eu1 -N1                      | 2.630(6) |
| Eu1-N2                       | 2.658(5) | Eu1 -N2                      | 2.660(6) |
| Eu1-N3                       | 2.585(5) | Eu1-N3                       | 2.573(6) |
| Eu1-N4                       | 2.623(4) | Eu1-N4                       | 2.623(6) |
| Eu1-N5                       | 2.686(5) | Eu1-N5                       | 2.686(6) |
| Eu1-N6                       | 2.606(4) | Eu1-N6                       | 2.610(6) |

**Table S10. Selected bond angles (°) for complexes R-Eu-Ph<sub>3</sub>PO and S-Eu-Ph<sub>3</sub>PO.**

| <b>R-Eu-Ph<sub>3</sub>PO</b> |            | <b>S-Eu-Ph<sub>3</sub>PO</b> |            |
|------------------------------|------------|------------------------------|------------|
| O1-Eu1-O2                    | 145.36(16) | O1-Eu1-O2                    | 145.24(19) |
| O1-Eu1-O3                    | 142.89(15) | O1-Eu1-O3                    | 142.77(18) |
| O1-Eu1-N1                    | 97.11(15)  | O1-Eu1-N1                    | 96.96(18)  |
| O1-Eu1-N2                    | 75.35(16)  | O1-Eu1-N2                    | 75.40(18)  |
| O1-Eu1-N3                    | 77.84(15)  | O1-Eu1-N3                    | 77.98(19)  |
| O1-Eu1-N4                    | 95.93(16)  | O1-Eu1-N4                    | 96.0(2)    |
| O1-Eu1-N5                    | 74.19(15)  | O1-Eu1-N5                    | 74.07(18)  |
| O1-Eu1-N6                    | 78.23(14)  | O1-Eu1-N6                    | 78.19(17)  |
| O2-Eu1-O3                    | 71.68(15)  | O2-Eu1-O3                    | 71.90(18)  |
| O2-Eu1-N1                    | 85.25(15)  | O2-Eu1-N1                    | 85.30(18)  |
| O2-Eu1-N2                    | 132.73(16) | O2-Eu1-N2                    | 132.70(18) |
| O2-Eu1-N3                    | 129.68(15) | O2-Eu1-N3                    | 129.77(18) |
| O2-Eu1-N4                    | 83.44(16)  | O2-Eu1-N4                    | 83.5(2)    |
| O2-Eu1-N5                    | 75.72(15)  | O2-Eu1-N5                    | 75.81(17)  |
| O2-Eu1-N6                    | 72.51(15)  | O2-Eu1-N6                    | 72.43(17)  |
| O3-Eu1-N1                    | 80.24(15)  | O3-Eu1-N1                    | 80.24(19)  |
| O3-Eu1-N2                    | 71.25(16)  | O3-Eu1-N2                    | 71.06(18)  |
| O3-Eu1-N3                    | 72.75(15)  | O3-Eu1-N3                    | 72.53(18)  |
| O3-Eu1-N4                    | 89.95(16)  | O3-Eu1-N4                    | 89.91(19)  |
| O3-Eu1-N5                    | 137.77(15) | O3-Eu1-N5                    | 137.98(18) |
| O3-Eu1-N6                    | 129.13(15) | O3-Eu1-N6                    | 129.10(18) |
| N1-Eu1-N2                    | 60.42(15)  | N1-Eu1-N2                    | 60.33(19)  |
| N1-Eu1-N5                    | 123.14(14) | N1-Eu1-N5                    | 123.24(18) |
| N2-Eu1-N5                    | 149.53(15) | N2-Eu1-N5                    | 149.46(18) |
| N3-Eu1-N1                    | 121.94(16) | N3-Eu1-N1                    | 121.74(19) |
| N3-Eu1-N2                    | 62.46(16)  | N3-Eu1-N2                    | 62.3(2)    |

|           |            |           |            |
|-----------|------------|-----------|------------|
| N3-Eu1-N4 | 62.13(15)  | N3-Eu1-N4 | 62.14(19)  |
| N3-Eu1-N5 | 111.03(15) | N3-Eu1-N5 | 111.07(18) |
| N3-Eu1-N6 | 156.06(15) | N3-Eu1-N6 | 156.17(17) |
| N4-Eu1-N1 | 166.92(16) | N4-Eu1-N1 | 166.98(18) |
| N4-Eu1-N2 | 124.51(15) | N4-Eu1-N2 | 124.41(19) |
| N4-Eu1-N5 | 59.98(14)  | N4-Eu1-N5 | 60.06(17)  |
| N6-Eu1-N1 | 61.87(15)  | N6-Eu1-N1 | 61.74(19)  |
| N6-Eu1-N2 | 111.42(15) | N6-Eu1-N2 | 111.30(19) |
| N6-Eu1-N4 | 120.26(15) | N6-Eu1-N4 | 120.54(18) |
| N6-Eu1-N5 | 61.34(14)  | N6-Eu1-N5 | 61.56(18)  |

**Table S11. The CShM values calculated by SHAPE 2.1 for R-Gd and S-Gd. The lowest CShM value is highlighted.<sup>1, 2</sup>**

| Coordination Geometry                           | R-Gd         |              | S-Gd         |              |
|-------------------------------------------------|--------------|--------------|--------------|--------------|
|                                                 | Gd1          | Gd2          | Gd1          | Gd2          |
| Enneagon ( $D_{9h}$ )                           | 32.892       | 32.671       | 32.916       | 32.708       |
| Octagonal pyramid ( $C_{8v}$ )                  | 22.048       | 21.799       | 22.102       | 21.693       |
| Heptagonal bipyramid ( $D_{7h}$ )               | 13.265       | 13.922       | 13.324       | 13.827       |
| Johnson triangular cupola J3 ( $C_{3v}$ )       | 14.858       | 15.272       | 14.889       | 15.349       |
| Capped cube J8 ( $C_{4v}$ )                     | 5.616        | 6.205        | 5.633        | 6.257        |
| Spherical-relaxed capped cube ( $C_{4v}$ )      | 4.326        | 4.418        | 4.335        | 4.459        |
| Capped square antiprism J10 ( $C_{4v}$ )        | 7.693        | 7.543        | 7.648        | 7.470        |
| Spherical capped square antiprism ( $C_{4v}$ )  | 6.320        | 6.187        | 6.289        | 6.125        |
| Tricapped trigonal prism J51 ( $D_{3h}$ )       | 7.668        | 7.737        | 7.663        | 7.678        |
| Spherical tricapped trigonal prism ( $D_{3h}$ ) | 7.464        | 7.207        | 7.446        | 7.159        |
| Tridiminished icosahedron J63 ( $C_{3v}$ )      | 11.949       | 12.305       | 11.899       | 12.298       |
| Hula-hoop ( $C_{2v}$ )                          | <b>2.663</b> | <b>2.743</b> | <b>2.681</b> | <b>2.734</b> |
| Muffin ( $C_s$ )                                | 4.686        | 4.627        | 4.646        | 4.576        |

**Table S12. The CShM values calculated by SHAPE 2.1 for R-Eu and S-Eu. The lowest CShM value is highlighted.<sup>1, 2</sup>**

| Coordination Geometry                           | R-Eu         |              | S-Eu         |              |
|-------------------------------------------------|--------------|--------------|--------------|--------------|
|                                                 | Eu1          | Eu2          | Eu1          | Eu2          |
| Enneagon ( $D_{9h}$ )                           | 32.921       | 32.622       | 32.858       | 32.664       |
| Octagonal pyramid ( $C_{8v}$ )                  | 22.139       | 21.734       | 22.249       | 21.620       |
| Heptagonal bipyramid ( $D_{7h}$ )               | 13.364       | 13.839       | 13.305       | 13.801       |
| Johnson triangular cupola J3 ( $C_{3v}$ )       | 14.925       | 15.395       | 14.987       | 15.486       |
| Capped cube J8 ( $C_{4v}$ )                     | 5.587        | 6.224        | 5.532        | 6.215        |
| Spherical-relaxed capped cube ( $C_{4v}$ )      | 4.295        | 4.437        | 4.200        | 4.423        |
| Capped square antiprism J10 ( $C_{4v}$ )        | 7.766        | 7.559        | 7.803        | 7.549        |
| Spherical capped square antiprism ( $C_{4v}$ )  | 6.384        | 6.179        | 6.412        | 6.199        |
| Tricapped trigonal prism J51 ( $D_{3h}$ )       | 7.757        | 7.743        | 7.799        | 7.718        |
| Spherical tricapped trigonal prism ( $D_{3h}$ ) | 7.535        | 7.217        | 7.508        | 7.257        |
| Tridiminished icosahedron J63 ( $C_{3v}$ )      | 11.835       | 12.312       | 11.798       | 12.300       |
| Hula-hoop ( $C_{2v}$ )                          | <b>2.610</b> | <b>2.724</b> | <b>2.590</b> | <b>2.681</b> |
| Muffin ( $C_s$ )                                | 4.753        | 4.622        | 4.755        | 4.635        |

**Table S13. The CShM values calculated by SHAPE 2.1 for R-Eu- $Ph_3PO$  and S-Eu- $Ph_3PO$ .**

| Coordination Geometry                          | R-Eu- $Ph_3PO$ | S-Eu- $Ph_3PO$ |
|------------------------------------------------|----------------|----------------|
| Enneagon( $D_{9h}$ )                           | 31.760         | 31.803         |
| Octagonal pyramid( $C_{8v}$ )                  | 20.951         | 20.891         |
| Heptagonal bipyramid( $D_{7h}$ )               | 14.305         | 14.294         |
| Johnson triangular cupola J3( $C_{3v}$ )       | 15.254         | 15.280         |
| Capped cube J8( $C_{4v}$ )                     | 7.414          | 7.399          |
| Spherical-relaxed capped cube( $C_{4v}$ )      | 6.371          | 6.373          |
| Capped square antiprism J10( $C_{4v}$ )        | 6.170          | 6.179          |
| Spherical capped square antiprism( $C_{4v}$ )  | 5.143          | 5.133          |
| Tricapped trigonal prism J51( $D_{3h}$ )       | 6.273          | 6.303          |
| Spherical tricapped trigonal prism( $D_{3h}$ ) | 5.972          | 5.960          |
| Tridiminished icosahedron J63( $C_{3v}$ )      | 12.303         | 12.308         |
| Hula-hoop( $C_{2v}$ )                          | <b>3.828</b>   | <b>3.838</b>   |
| Muffin( $C_s$ )                                | <b>3.684</b>   | <b>3.683</b>   |

**Table S14. The CShM values calculated by SHAPE 2.1 for R-Y.**

| Coordination Geometry                                | Y1           | Y2           |
|------------------------------------------------------|--------------|--------------|
| Enneagon(D <sub>9h</sub> )                           | 32.946       | 32.829       |
| Octagonal pyramid(C <sub>8v</sub> )                  | 21.942       | 21.668       |
| Heptagonal bipyramid(D <sub>7h</sub> )               | 13.308       | 13.995       |
| Johnson triangular cupola J3(C <sub>3v</sub> )       | 14.833       | 15.260       |
| Capped cube J8(C <sub>4v</sub> )                     | 5.676        | 6.182        |
| Spherical-relaxed capped cube(C <sub>4v</sub> )      | 4.416        | 4.428        |
| Capped square antiprism J10(C <sub>4v</sub> )        | 7.477        | 7.282        |
| Spherical capped square antiprism(C <sub>4v</sub> )  | 6.145        | 5.953        |
| Tricapped trigonal prism J51(D <sub>3h</sub> )       | 7.487        | 7.474        |
| Spherical tricapped trigonal prism(D <sub>3h</sub> ) | 7.286        | 6.966        |
| Tridiminished icosahedron J63(C <sub>3v</sub> )      | 12.064       | 12.466       |
| Hula-hoop(C <sub>2v</sub> )                          | <b>2.790</b> | <b>2.845</b> |
| Muffin(C <sub>s</sub> )                              | 4.559        | 4.432        |

**Table S15. CPL brightness for R/S-Eu and R/S-Eu-Ph<sub>3</sub>PO.**

| Compound                            | $\epsilon/M^{-1}cm^{-1}$<br>( $\lambda_{abs}/nm$ ) | $\varphi$ | Transition                                                | $ g_{lum} $<br>( $\lambda/nm$ ) | $\beta$ | $B_{CPL}/M^{-1} cm^{-1}$ |
|-------------------------------------|----------------------------------------------------|-----------|-----------------------------------------------------------|---------------------------------|---------|--------------------------|
| <b>R/S-Eu</b>                       | 46558<br>(312)                                     | 0.18      | <sup>5</sup> D <sub>0</sub> → <sup>7</sup> F <sub>0</sub> | 0.042<br>(582)                  | 0.007   | 1.27                     |
|                                     |                                                    |           | <sup>5</sup> D <sub>0</sub> → <sup>7</sup> F <sub>1</sub> | 0.098<br>(597)                  | 0.174   | 71.45                    |
|                                     |                                                    |           | <sup>5</sup> D <sub>0</sub> → <sup>7</sup> F <sub>2</sub> | 0.024<br>(616)                  | 0.395   | 39.72                    |
|                                     |                                                    |           | <sup>5</sup> D <sub>0</sub> → <sup>7</sup> F <sub>3</sub> | 0.055<br>(651)                  | 0.044   | 10.14                    |
| <b>R/S-Eu-<br/>Ph<sub>3</sub>PO</b> | 21864<br>(312)                                     | 0.17      | <sup>5</sup> D <sub>0</sub> → <sup>7</sup> F <sub>0</sub> | 0.032<br>(582)                  | 0.004   | 0.24                     |
|                                     |                                                    |           | <sup>5</sup> D <sub>0</sub> → <sup>7</sup> F <sub>1</sub> | 0.110<br>(597)                  | 0.151   | 30.89                    |
|                                     |                                                    |           | <sup>5</sup> D <sub>0</sub> → <sup>7</sup> F <sub>2</sub> | 0.029<br>(616)                  | 0.266   | 14.35                    |
|                                     |                                                    |           | <sup>5</sup> D <sub>0</sub> → <sup>7</sup> F <sub>3</sub> | 0.060<br>(651)                  | 0.021   | 2.34                     |

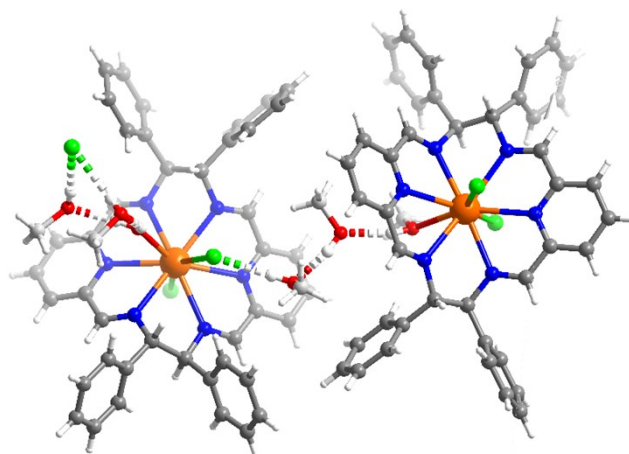

**Fig. S1** The intermolecular H-bonds in S-Gd.

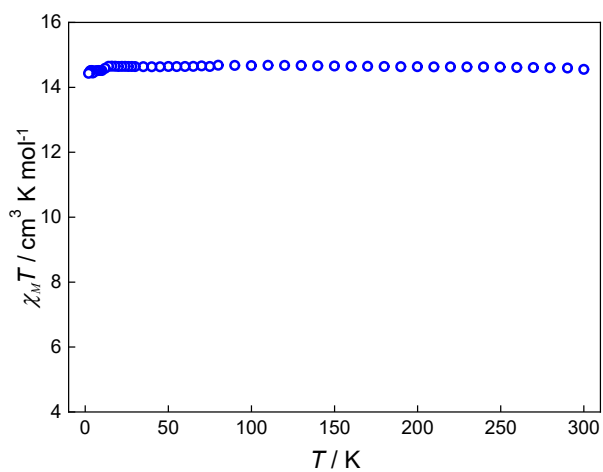

**Fig. S2** The variable-temperature magnetic susceptibilities of S-Gd.

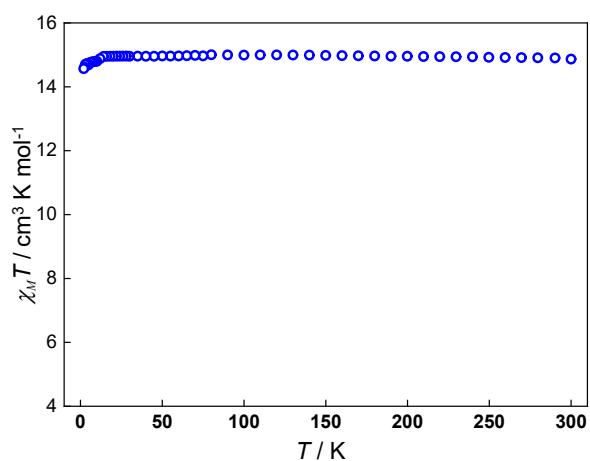

**Fig. S3** The variable-temperature magnetic susceptibilities of R-Gd.

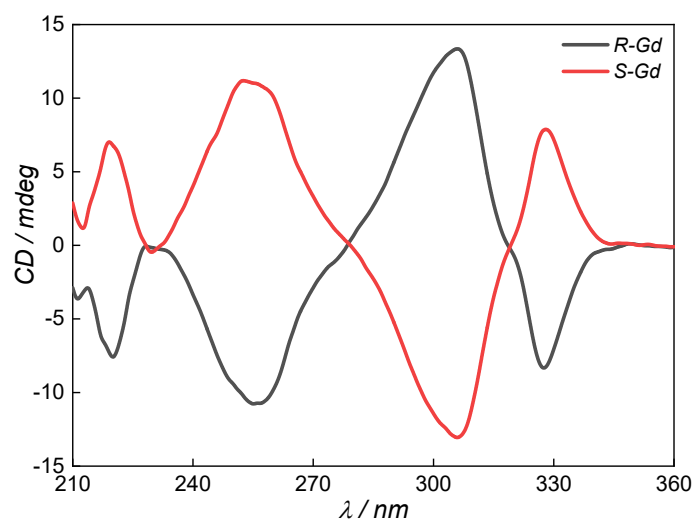

**Fig. S4** CD spectra of R/S-Eu in CH<sub>3</sub>OH ( $c = 1 \times 10^{-5}$  mol L<sup>-1</sup>).

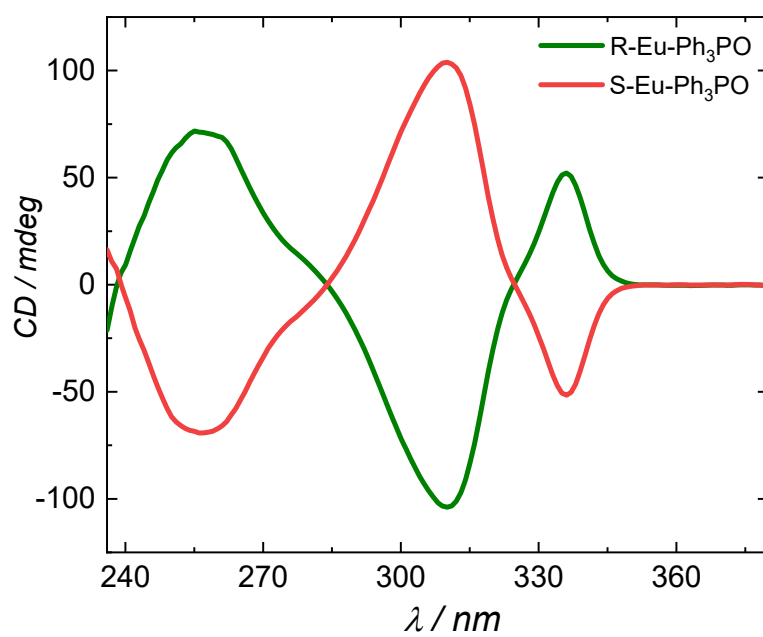

**Fig. S5** CD spectra of R/S-Eu-Ph<sub>3</sub>PO in CH<sub>3</sub>OH ( $c = 1 \times 10^{-5}$  mol L<sup>-1</sup>).

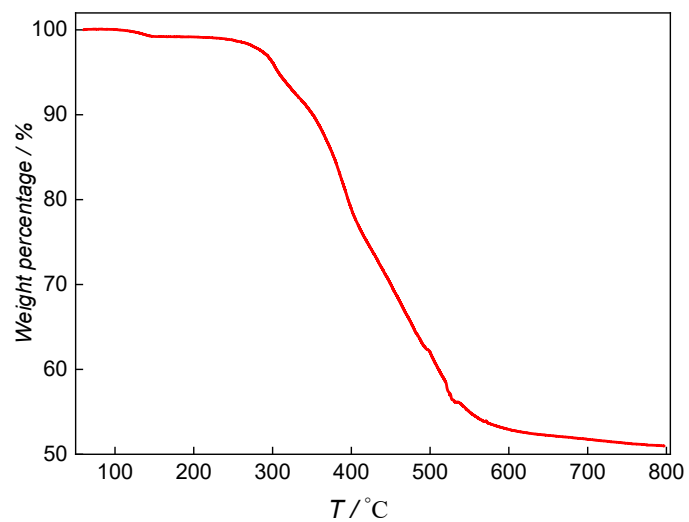

**Fig. S6 Thermogravimetric analysis of S-Eu.**

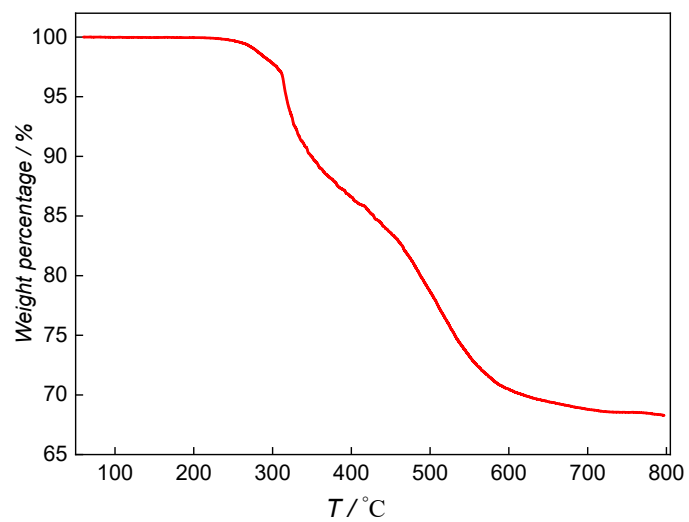

**Fig. S7 Thermogravimetric analysis of S-Gd.**

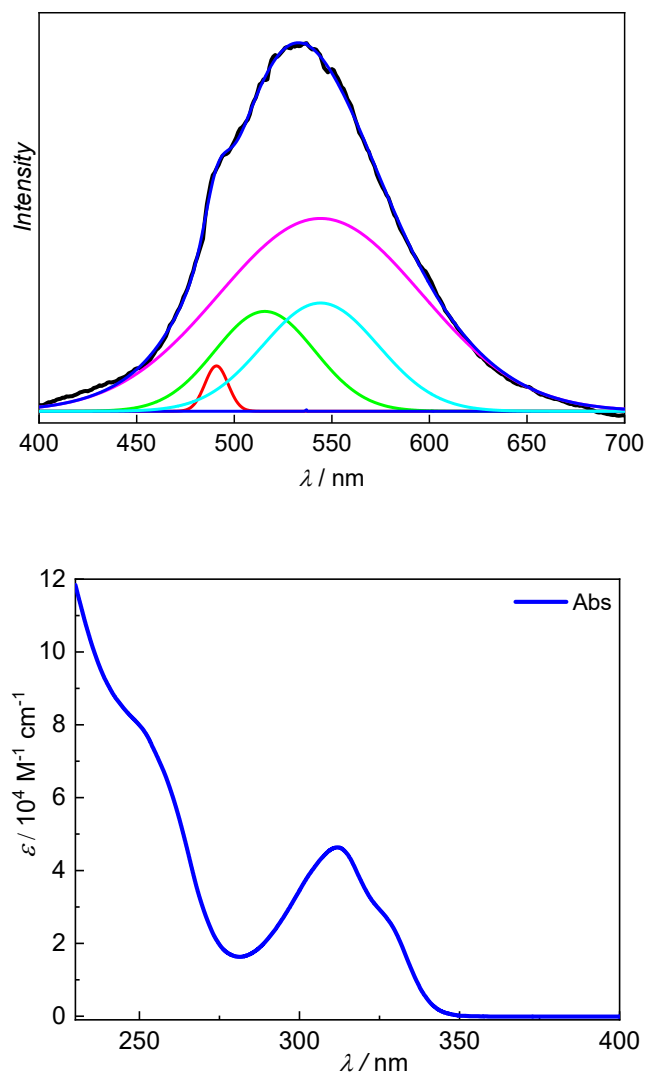

**Fig. S8 (Top)** Phosphorescence spectrum of **S-Gd** collected in the solid state under excitation at 306 nm (black line, 77 K) and its Gaussian decomposition (colored traces); (Bottom) Absorption spectra of S-Eu in molar absorptivity in **CH<sub>3</sub>OH** ( $c = 1 \times 10^{-5} \text{ mol L}^{-1}$ ).



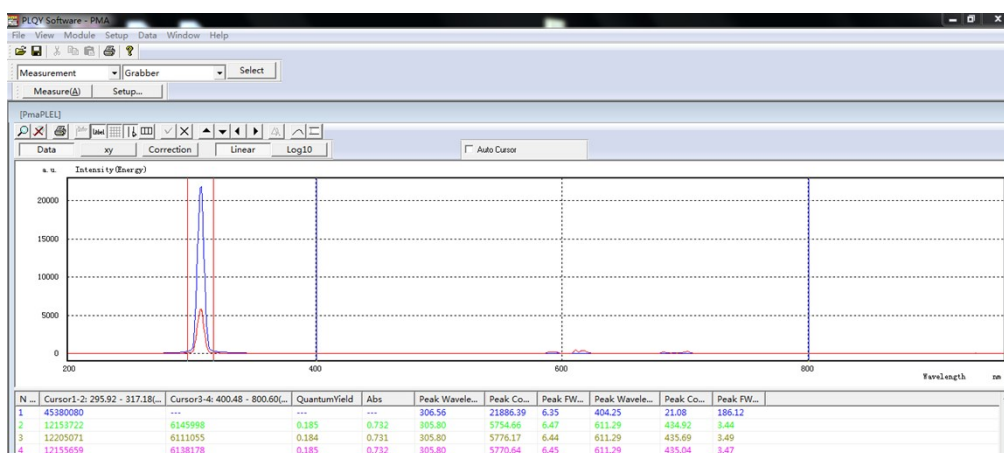

Fig. S9 Quantum yield of S-Eu in CH<sub>3</sub>OH ( $1.0 \times 10^{-5}$  M) at room temperature.

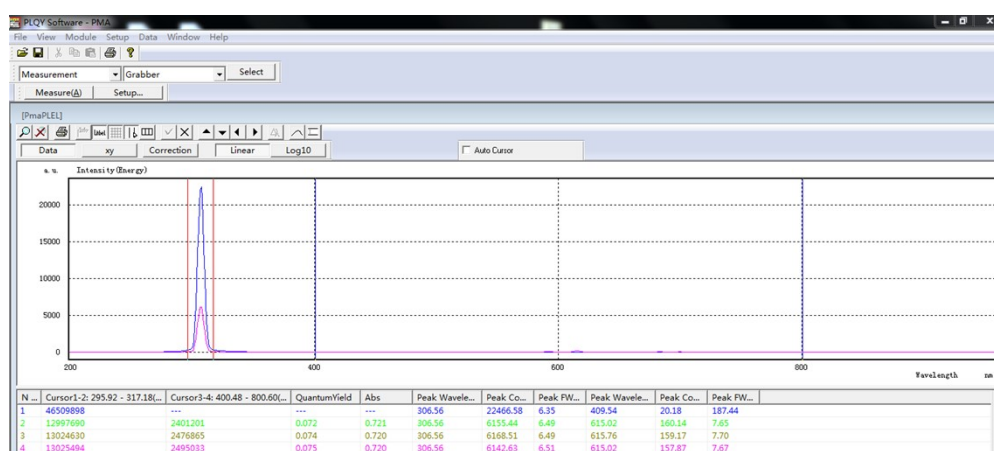

Fig. S10 Quantum yield of S-Eu in H<sub>2</sub>O ( $1.0 \times 10^{-5}$  M) at room temperature.

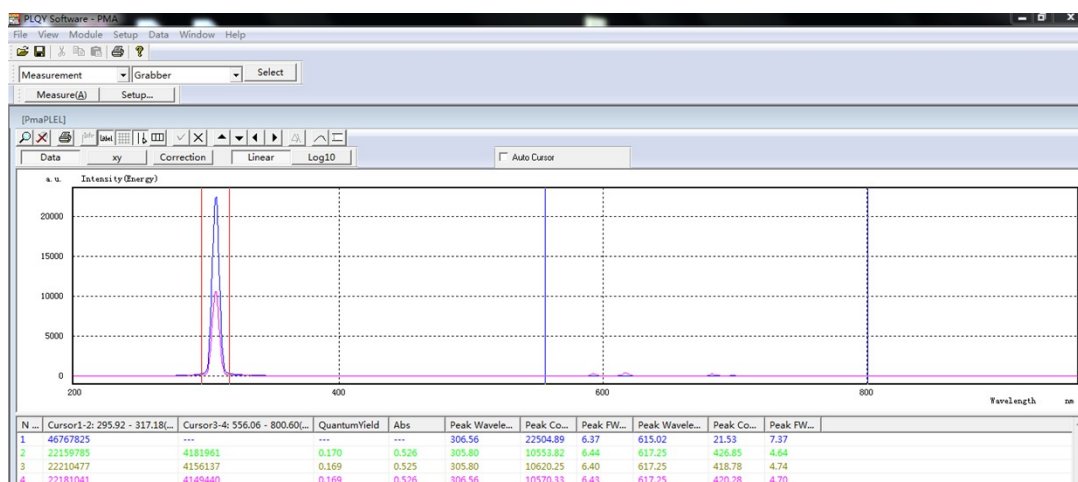

**Fig. S11** Quantum yield of **S-Eu-Ph<sub>3</sub>PO** in CH<sub>3</sub>OH ( $1.0 \times 10^{-5}$  M) at room temperature.

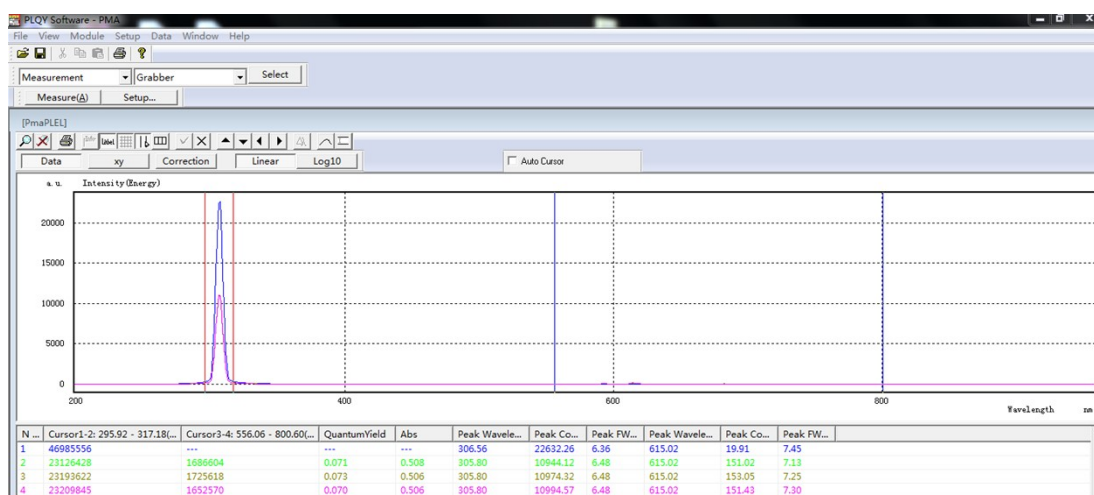

**Fig. S12** Quantum yield of **S-Eu-Ph<sub>3</sub>PO** in H<sub>2</sub>O ( $1.0 \times 10^{-5}$  M) at room temperature.

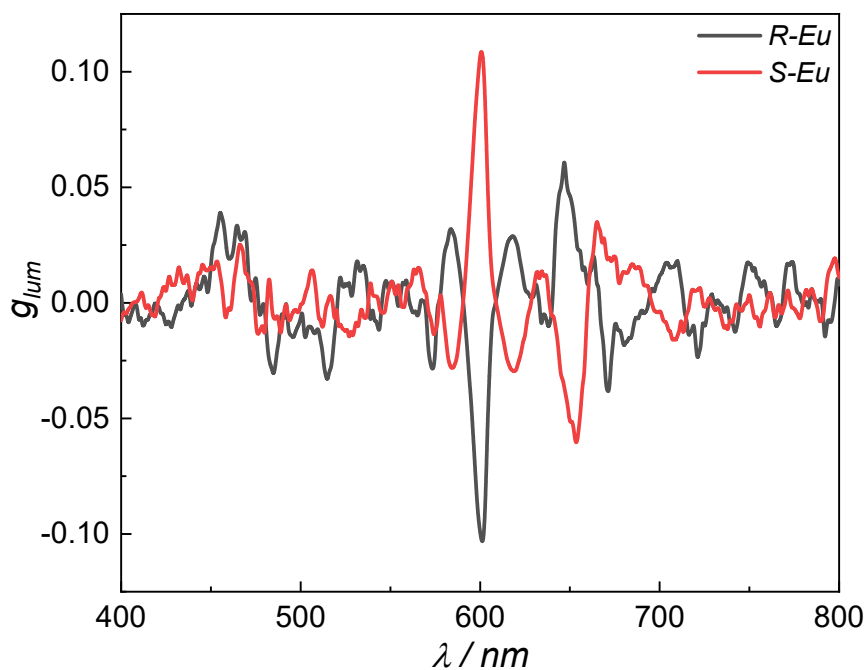

**Fig. S13** Circularly polarized luminescence ( $g_{lum}$ ) spectra of **R/S-Eu** collected from  $1.2 \times 10^{-5}$  M solutions in  $\text{CH}_3\text{OH}$  at room temperature upon excitation at 329 nm.

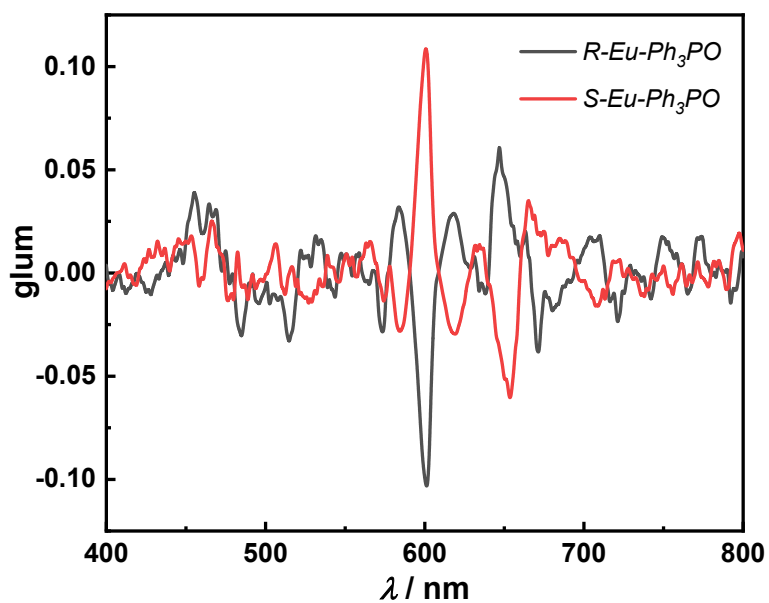

**Fig. S14** Circularly polarized luminescence ( $g_{lum}$ ) spectra of **R/S-Eu-Ph<sub>3</sub>PO** collected from  $1.2 \times 10^{-5}$  M solutions in  $\text{CH}_3\text{OH}$  at room temperature upon excitation at 329 nm.

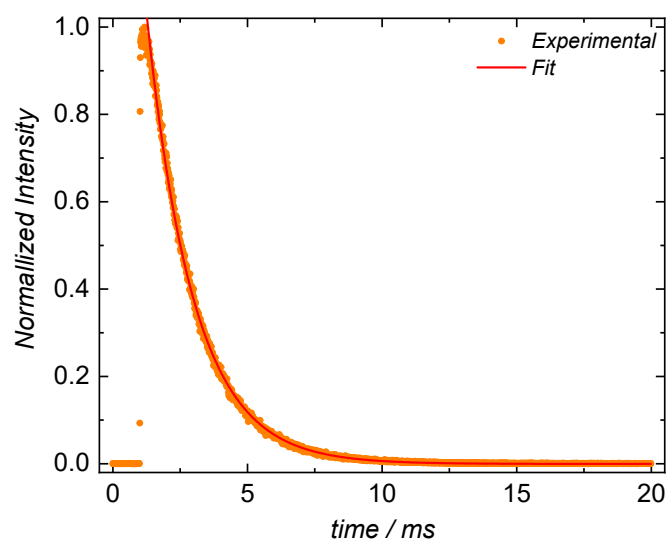

**Fig. S15** Decay curve of **S-Eu** in  $D_2O$  at room temperature,  $c = 1.0 \times 10^{-5}$  M, gives the luminescence lifetime of 1.734 ms.

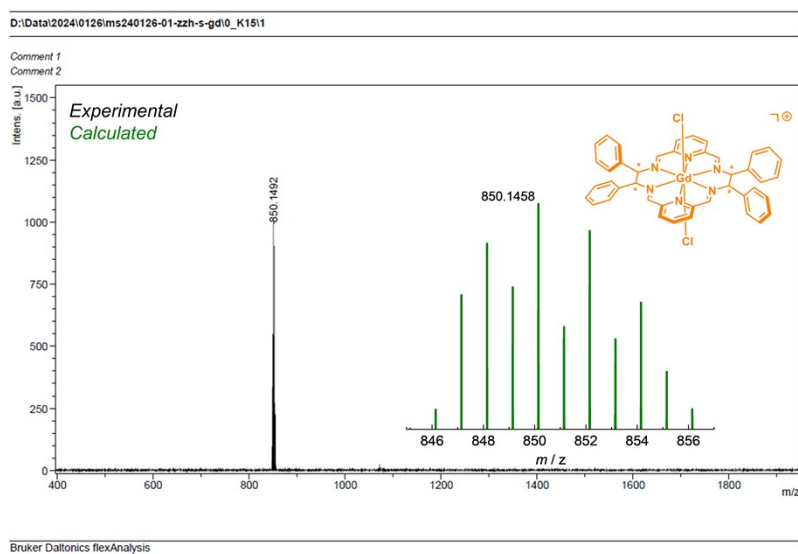

**Fig. S16** HR-MALDI-TOF spectrum of **S-Gd** in  $CH_3OH$  at room temperature.

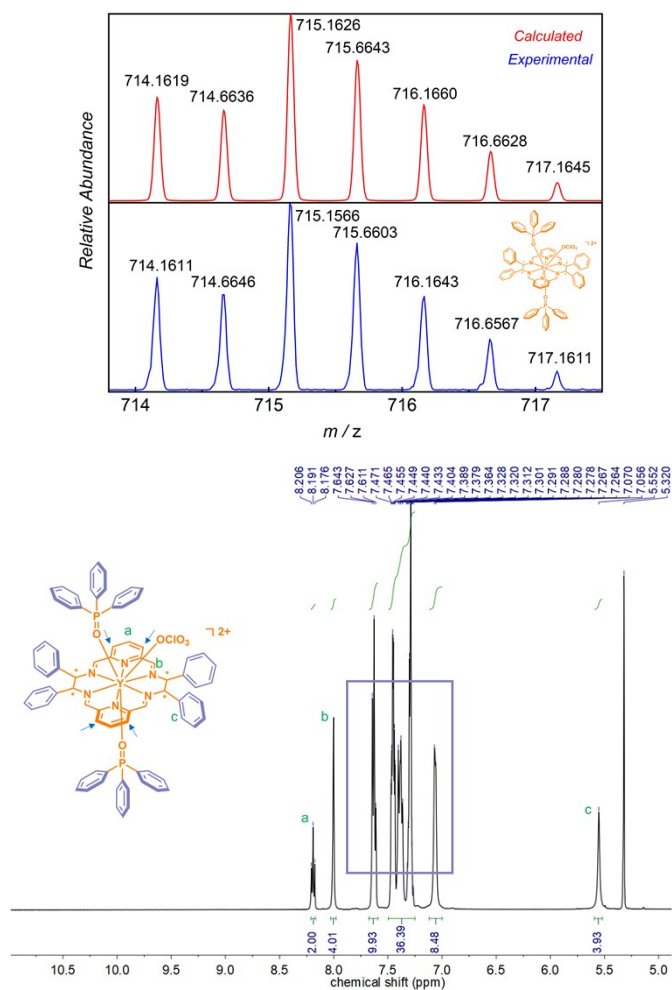

**Fig. S17** HR-ESI-MS and simulated spectra of **S-Eu-Ph<sub>3</sub>PO** in CH<sub>3</sub>OH (top) and <sup>1</sup>H spectrum of isostructural Y(III) compound in CD<sub>3</sub>OD (bottom).

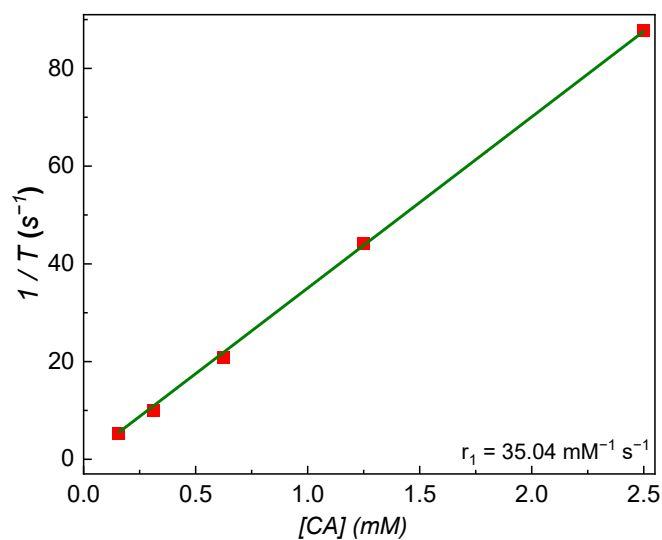

**Fig. S18** Relaxivity determined from concentration-dependent  $T_1$ -weighted MR measurements at 1.2 T of **R-Gd** at room temperature.

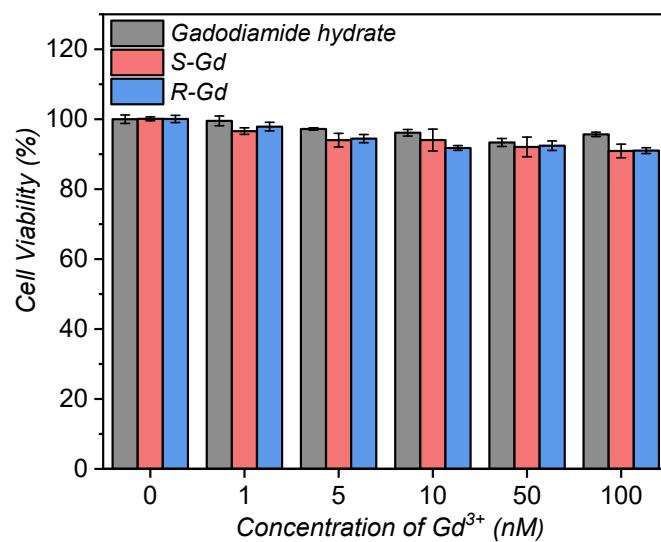

**Fig. S19** Cell viabilities of A549 cells after incubated with various concentrations of Gd(III)-based compounds for 24 h.

## References

1. D. Casanova, J. Cirera, M. Llunell, P. Alemany, D. Avnir and S. Alvarez, *J. Am. Chem. Soc.*, 2004, **126**, 1755-1763.
2. M. Pinsky and D. Avnir, *Inorg. Chem.*, 1998, **37**, 5575-5582.
